# Supplementary material for: Understanding polyatomic interference in the determination of phosphorus via PO molecules using high-resolution continuum source graphite furnace molecular absorption spectrometry with direct solid analysis
Source: Royal Society of Chemistry journal article supplement (doi:10.1039/d0ja00254b), 2020-01-01
Supplement: d0ja00254b1.pdf [file d0ja00254b1.pdf]

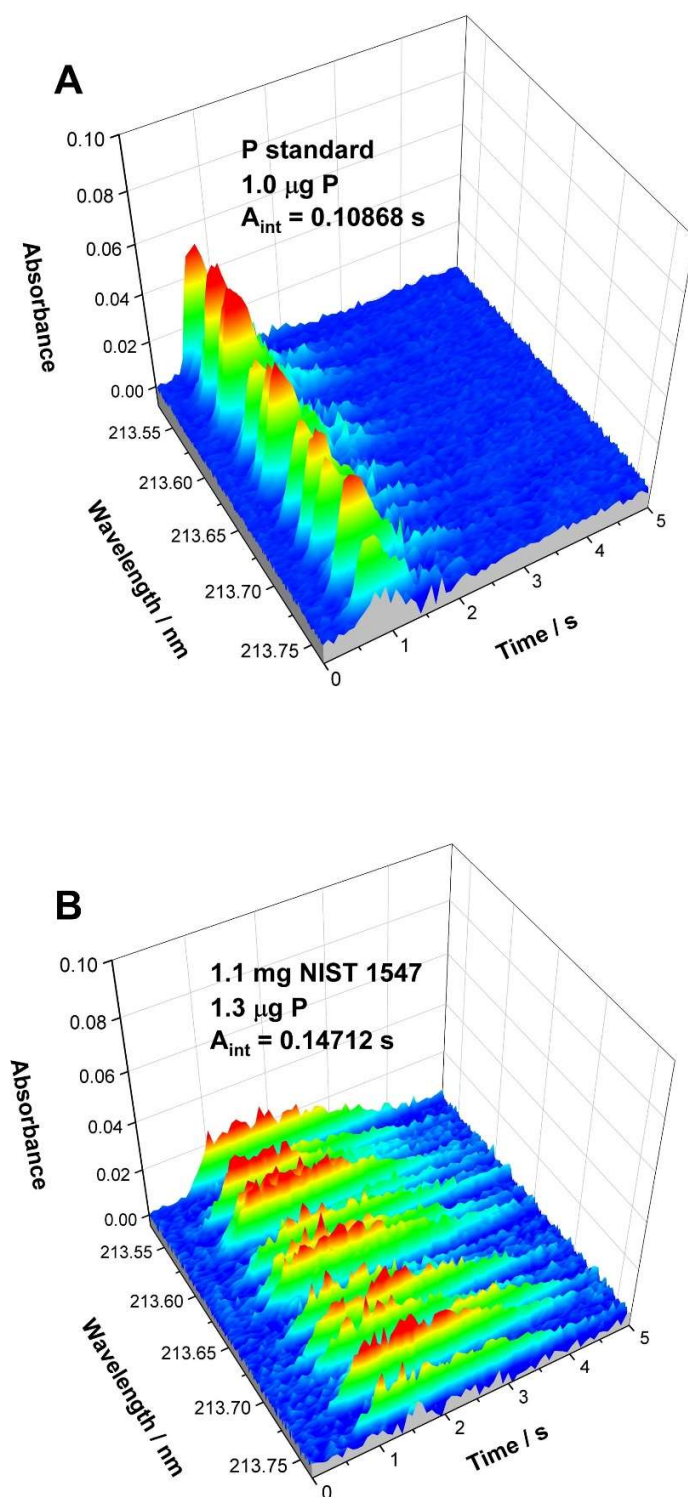

**Figure S1.** Wavelength- and time-resolved spectra recorded for (A) 1.0  $\mu\text{g}$  of P introduced as standard solution with 10  $\mu\text{g Au}$  / 15  $\mu\text{g Ca}$ ; and (B) 1.1 mg of CRM NIST 1547 with 10  $\mu\text{g Au}$  under the temperature conditions described in Table 1.
